# Supplementary material for: Perceived Impact as the Underpinning Mechanism of the End-Spurt and U-Shape Pacing Patterns
Source: Front Psychol. 2019 May 8;10:1082. doi: 10.3389/fpsyg.2019.01082 (PMC6519309; doi:10.3389/fpsyg.2019.01082)
Supplement: Supplementary file 2 [file Data_Sheet_1.CSV]

	sim_id	interval1	interval2	interval3	interval4
1	1	7.04597776192055	6.88311898442672	7.0648144960999	6.78687965419568
2	2	7.29921860700735	6.76456071124998	6.66045596465011	7.15583296517925
3	3	6.82409910537563	6.96746956252233	6.89777998714101	6.97348055341218
4	4	7.07572767419714	7.11941736571366	6.67122594002729	7.39138745889499
5	5	6.89463696443258	7.05269835458883	6.63261751957037	6.88670178106671
6	6	6.87520665504475	7.00199640033034	6.95612049688998	7.50711456718412
7	7	6.56288868976553	6.62487688124131	7.13576036630075	7.12749508077414
8	8	7.02904720054303	6.75598880095399	6.84868050298821	7.06903217280017
9	9	6.81453944941622	6.51417110978209	6.60103137620372	6.64808768010138
10	10	7.03610043140527	6.47935999173298	6.31705193383563	7.11432578451413
11	11	7.27279242108753	6.77968705826428	7.10292726295887	7.00776242394324
12	12	7.64364573044872	6.60442570665281	6.92590900621713	6.86494586986259
13	13	6.73669227348834	6.84829595411337	7.21255679475675	7.18397499367847
14	14	7.10050101293109	6.88341092519851	6.67275005542379	6.66857811640297
15	15	6.84511306109927	6.36447255540186	6.76482781409341	7.0645969372742
16	16	7.14214644954271	6.58656211152273	6.96802887099819	7.19693005017001
17	17	6.77126005221668	6.93312668403718	6.8406104368563	6.86444558398383
18	18	7.39181364054349	6.54819930308395	6.87001589206904	6.84328753168882
19	19	7.1845116733875	6.88261790758398	6.96385664428717	7.18563265318211
20	20	7.48344062960249	6.84641346236251	6.78372735948616	6.83077102284027
21	21	7.22510460779607	6.88567662783772	6.53318877744143	7.18080415531677
22	22	7.01499336524971	6.74537525215285	6.424687395642	7.61161096812766
23	23	7.30153381956114	6.36084632350207	6.50033140712069	7.2175215479423
24	24	6.75054230250813	6.53278316672035	6.99113992732813	7.14576660886299
25	25	6.92059615857406	6.69420928775441	6.83878761010983	7.2298749303809
26	26	7.25340137503814	6.60949635967561	6.9193937079971	7.05239705125347
27	27	7.13708720191489	6.65379010594987	6.76396490114427	6.64954375355814
28	28	6.86112173905669	6.89939387702039	7.06497904085328	6.43223506312583
29	29	6.78779147938372	6.32801349453812	6.53617434864158	7.45056956451774
30	30	7.03216708142999	6.80771018680501	6.83876459576794	7.22686376362279
