# Supplementary material for: Perceived Impact as the Underpinning Mechanism of the End-Spurt and U-Shape Pacing Patterns
Source: Front Psychol. 2019 May 8;10:1082. doi: 10.3389/fpsyg.2019.01082 (PMC6519309; doi:10.3389/fpsyg.2019.01082)
Supplement: Supplementary file 3 [file Data_Sheet_2.CSV]

	sim_id	interval	running_speed
1	1	1	7.04597776192055
2	2	1	7.29921860700735
3	3	1	6.82409910537563
4	4	1	7.07572767419714
5	5	1	6.89463696443258
6	6	1	6.87520665504475
7	7	1	6.56288868976553
8	8	1	7.02904720054303
9	9	1	6.81453944941622
10	10	1	7.03610043140527
11	11	1	7.27279242108753
12	12	1	7.64364573044872
13	13	1	6.73669227348834
14	14	1	7.10050101293109
15	15	1	6.84511306109927
16	16	1	7.14214644954271
17	17	1	6.77126005221668
18	18	1	7.39181364054349
19	19	1	7.1845116733875
20	20	1	7.48344062960249
21	21	1	7.22510460779607
22	22	1	7.01499336524971
23	23	1	7.30153381956114
24	24	1	6.75054230250813
25	25	1	6.92059615857406
26	26	1	7.25340137503814
27	27	1	7.13708720191489
28	28	1	6.86112173905669
29	29	1	6.78779147938372
30	30	1	7.03216708142999
31	1	2	6.88311898442672
32	2	2	6.76456071124998
33	3	2	6.96746956252233
34	4	2	7.11941736571366
35	5	2	7.05269835458883
36	6	2	7.00199640033034
37	7	2	6.62487688124131
38	8	2	6.75598880095399
39	9	2	6.51417110978209
40	10	2	6.47935999173298
41	11	2	6.77968705826428
42	12	2	6.60442570665281
43	13	2	6.84829595411337
44	14	2	6.88341092519851
45	15	2	6.36447255540186
46	16	2	6.58656211152273
47	17	2	6.93312668403718
48	18	2	6.54819930308395
49	19	2	6.88261790758398
50	20	2	6.84641346236251
51	21	2	6.88567662783772
52	22	2	6.74537525215285
53	23	2	6.36084632350207
54	24	2	6.53278316672035
55	25	2	6.69420928775441
56	26	2	6.60949635967561
57	27	2	6.65379010594987
58	28	2	6.89939387702039
59	29	2	6.32801349453812
60	30	2	6.80771018680501
61	1	3	7.0648144960999
62	2	3	6.66045596465011
63	3	3	6.89777998714101
64	4	3	6.67122594002729
65	5	3	6.63261751957037
66	6	3	6.95612049688998
67	7	3	7.13576036630075
68	8	3	6.84868050298821
69	9	3	6.60103137620372
70	10	3	6.31705193383563
71	11	3	7.10292726295887
72	12	3	6.92590900621713
73	13	3	7.21255679475675
74	14	3	6.67275005542379
75	15	3	6.76482781409341
76	16	3	6.96802887099819
77	17	3	6.8406104368563
78	18	3	6.87001589206904
79	19	3	6.96385664428717
80	20	3	6.78372735948616
81	21	3	6.53318877744143
82	22	3	6.424687395642
83	23	3	6.50033140712069
84	24	3	6.99113992732813
85	25	3	6.83878761010983
86	26	3	6.9193937079971
87	27	3	6.76396490114427
88	28	3	7.06497904085328
89	29	3	6.53617434864158
90	30	3	6.83876459576794
91	1	4	6.78687965419568
92	2	4	7.15583296517925
93	3	4	6.97348055341218
94	4	4	7.39138745889499
95	5	4	6.88670178106671
96	6	4	7.50711456718412
97	7	4	7.12749508077414
98	8	4	7.06903217280017
99	9	4	6.64808768010138
100	10	4	7.11432578451413
101	11	4	7.00776242394324
102	12	4	6.86494586986259
103	13	4	7.18397499367847
104	14	4	6.66857811640297
105	15	4	7.0645969372742
106	16	4	7.19693005017001
107	17	4	6.86444558398383
108	18	4	6.84328753168882
109	19	4	7.18563265318211
110	20	4	6.83077102284027
111	21	4	7.18080415531677
112	22	4	7.61161096812766
113	23	4	7.2175215479423
114	24	4	7.14576660886299
115	25	4	7.2298749303809
116	26	4	7.05239705125347
117	27	4	6.64954375355814
118	28	4	6.43223506312583
119	29	4	7.45056956451774
120	30	4	7.22686376362279
