# Supplementary material for: Perceived Impact as the Underpinning Mechanism of the End-Spurt and U-Shape Pacing Patterns
Source: Front Psychol. 2019 May 8;10:1082. doi: 10.3389/fpsyg.2019.01082 (PMC6519309; doi:10.3389/fpsyg.2019.01082)
Supplement: Supplementary file 6 [file Data_Sheet_5.CSV]

	interval1	interval2	interval3	interval4	interval5	interval6	interval7	interval8	interval9	interval10	sim_id
1	6.00720016435742	5.90620367557893	5.95231692206581	5.84406616836909	6.12604843650539	5.87441443020933	5.83319980196811	5.70912138423728	5.72466005252993	6.46523219682563	1
2	6.33326495228625	5.79393721462129	5.82620615515079	6.00144727646407	6.15810787242811	6.20249279811434	6.03913377537408	6.17847314048334	6.07514031576791	5.89069410265713	2
3	6.12427896679825	5.926840741152	6.27172691340814	5.72149234062617	5.95592391411777	5.84644563114763	6.23098599455206	6.15672669421328	6.25319207828769	5.87989636294382	3
4	5.84735065739242	6.09864436710701	6.0606397914493	5.91934669293383	5.80463756733715	6.16186978176777	6.21852707425345	5.81488100269707	6.06563404520838	6.20817911836583	4
5	6.10332393751216	6.02841193098441	6.02147839563946	5.77624714017319	5.74299478204356	6.1394506619182	6.2025931557979	6.13179804379724	5.84854728996741	6.27743527939296	5
6	6.05482641126541	5.99329959830023	5.85691874241594	6.17010904074069	5.89293076345541	5.9855624198602	6.27186024249935	6.01569878321449	5.75361960890166	5.96359691279544	6
7	6.03044390174688	6.29439507027106	5.91711221177422	6.28737766343201	5.85921943239006	6.122675032636	5.97682408793527	6.14516011286098	6.08045351872606	6.16680854365741	7
8	6.06832387491901	6.15848849781339	5.82345140509759	5.89105320651549	6.17363184008029	6.26148651912562	5.91223178098927	5.95471302900141	5.98487271743382	6.09330989570065	8
9	6.23704749589171	6.16775610323194	6.09021090524977	5.93871521951881	5.89552136026947	5.69671764832579	5.95623907269505	6.11826963532955	5.63775660233902	6.18076169231488	9
10	6.14214269351036	5.97257801419556	5.9762858819874	6.03677557983067	6.14126519730004	6.13476234555277	6.1160420389159	6.11389198179543	6.02910457360108	6.44328218946695	10
11	5.99646096822866	6.3818218274041	6.18732781069158	5.68187922882297	6.05166635896601	6.29970546586771	6.00885767972279	6.18272793808192	5.93036358263504	5.96694823640476	11
12	5.97561802922696	6.01018650828349	6.22696411098101	6.09953181761777	5.77773266900219	5.91702102778814	6.16884554932713	6.0075087739709	5.91397349838379	6.19295413792032	12
13	5.86669041949437	6.0082785195216	6.01227793621181	5.99673663284544	6.016954771414	5.94138914963313	6.02151029019943	5.72287200526965	5.92631169082276	6.26337509963856	13
14	6.06549757310541	5.96426707310017	5.92239362397598	5.90340600321455	6.09298143578095	5.73593781540672	5.84147155771393	5.62250418448136	6.12310037541185	6.45478369515044	14
15	6.04802840514557	6.15229064713265	6.21666168500493	5.96305521006161	5.98262976103185	6.00971240887191	5.83459266959563	5.98352121082748	6.06023322771335	6.39616574775291	15
16	6.30316916933029	6.04212995326755	6.17186812880539	5.98366496669601	5.79082667167385	5.86103403277212	6.06469799938698	5.84394831811058	6.09326443423501	6.52851054424229	16
17	6.04774751760977	6.1052398229043	5.96106727477749	6.15355427105371	6.13586095686414	5.96419085864437	6.06495722374603	6.12240359711502	5.81731973742189	6.40034519634165	17
18	5.92738535105415	5.88078029080436	5.98803719508786	6.10548676544982	5.89683298639148	6.01434271111514	6.02854010418345	6.02670488529595	6.29311989157204	5.96874598156961	18
19	6.22218891740531	5.77351765103048	5.9097820615089	5.88201195920116	6.21474503976559	5.94854385333938	5.93643449675621	6.00497797296906	5.77786917377848	5.91051780231675	19
20	6.36308803525802	5.88745445761285	6.13024244370762	6.11903464423566	5.77892322028128	6.13444485223811	6.00747687028693	6.03546318538075	6.1990211662856	5.8967285659524	20
21	6.21700344244003	6.2981241537215	5.81668976083557	6.39080516479107	6.1146626624914	6.05343013757019	5.82376952064533	6.2748446094937	6.17484312213471	6.19130313237069	21
22	6.18034216110325	5.84704230642436	6.04848592173239	6.01652479242991	6.0194220705673	5.87787683390162	5.92832274215386	6.08738510070233	6.00991880368159	5.98177275333737	22
23	5.84305726089165	5.84965169572716	5.75813065227317	6.20404359042464	5.87299033810111	6.2534294269091	6.13329342363425	6.03875967650744	6.29565827261961	6.23079143623028	23
24	6.07952935199691	5.94034594748559	5.92662925923564	6.12480476340763	5.90112828168774	5.87526934837121	6.0625481061008	6.41833191010006	5.78735768138152	6.20382811141669	24
25	6.12624444093071	5.75111074120164	6.24525452446607	6.1110552083266	5.98265661384025	6.09875592793216	5.88261643083605	5.83448310084419	5.85013005308196	6.33507276798055	25
26	6.2447636037847	6.25945702049577	6.09956323428535	5.85018984087666	5.84421236549883	6.0090123369633	5.8722031549954	6.02199856186051	5.72389892456043	6.12051020337953	26
27	6.18978908136949	6.07690057085715	6.3197809751826	5.93751791644784	5.87177890870971	5.88649126311701	6.06874250892557	6.0594207601667	5.94247256380086	6.1462762178042	27
28	6.08401191009651	6.33338105121596	5.90367188508722	6.05611812651261	6.00007684887599	6.16603428304363	5.98234780080465	6.05449252575156	6.0660555431865	6.36079781130185	28
29	6.15231976617807	6.06683875371963	5.77698666802434	5.97007721532843	5.9417148491572	6.02907817421989	5.60911450306357	5.98837143685857	6.03466204770619	6.17360724000941	29
30	6.30777822271399	5.77348774954169	5.96740505794648	6.13031707060183	6.0042207685532	6.10429170615133	6.33374012099426	6.12929131900426	6.05017341105929	6.2280690534724	30
31	6.18660456996152	6.18490456018338	6.11119813308077	6.00541617567557	6.0873736379546	6.0804469821954	5.90856317044593	6.24099023698937	5.90862303066814	6.29383854974074	31
32	5.73298352354475	6.4023049313341	5.90574217240738	6.01969626025543	6.00051684196774	5.89828776669931	5.72498774094877	5.71464082323191	6.07187087450812	5.98921324527696	32
33	6.16086143109961	6.15201775974255	6.29324899463003	5.93142339797469	5.75231151893238	5.99573656217048	6.10167012006984	5.81281190540729	5.94479608821774	6.0150853674672	33
34	5.91561316713271	6.07998227286692	6.21526286945622	6.06687004260467	5.70439048940753	6.09085123288255	5.80954499309734	6.28451641058045	5.81375771531384	6.19792329881962	34
